# Supplementary material for: Ordering of monomers, dimers and polymers of deposited Br2I2Py molecules: a modeling study
Source: Royal Society of Chemistry journal article supplement (doi:10.1039/d2cp05463a), 2022-12-21
Supplement: d2cp05463a1.pdf [file d2cp05463a1.pdf]

# **Supplementary Information to**

## **Ordering of monomers, dimers and polymers of**

### **deposited Br<sub>2</sub>I<sub>2</sub>Py molecules: a modeling study**

Andrius Ibenskas,<sup>\*,†</sup> Mantas Šimėnas,<sup>‡</sup> and Evaldas E. Tornau<sup>†</sup>

<sup>†</sup>*Center for Physical Sciences and Technology, Saulėtekio 3, LT-10257 Vilnius, Lithuania*

<sup>‡</sup>*Faculty of Physics, Vilnius University, Saulėtekio 9, LT-10222 Vilnius, Lithuania*

E-mail: andrius.ibenskas@ftmc.lt

## Types of $e_x$ interaction

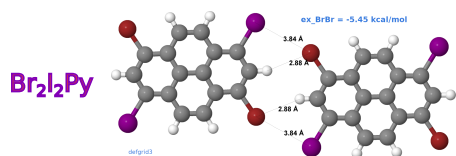

$$e_{x1} = -5.45 \text{ kcal/mol}$$

$$e_{x1} \approx 2e_x(\text{Br-I}) + 2e_x(\text{Br-H}) \quad (1x)$$

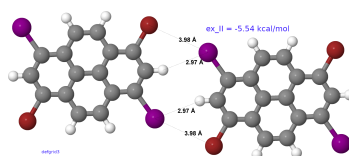

$$e_{x2} = -5.54 \text{ kcal/mol}$$

$$e_{x2} \approx 2e_x(\text{Br-I}) + 2e_x(\text{I-H}) \quad (2x)$$

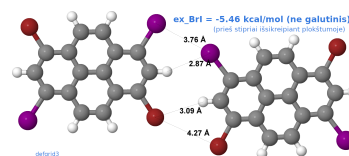

$$e_{x3} = -5.46 \text{ kcal/mol}$$

$$e_{x3} \approx e_x(\text{I-I}) + e_x(\text{Br-Br}) + e_x(\text{I-H}) + e_x(\text{Br-H}) \quad (3x)$$

$$(2x) - (1x)$$

$$e_x(\text{I-H}) - e_x(\text{Br-H}) = -0.05 \text{ kcal/mol} \sim 0$$

$$[ (1x) + (2x) ] / 2 - (3x)$$

$$2e_x(\text{Br-I}) - e_x(\text{I-I}) - e_x(\text{Br-Br}) = -0.04 \text{ kcal/mol} \sim 0 \quad (5x)$$

$$(1x) - (4x)$$

$$e_x(\text{Br-I}) - e_x(\text{Br-Br}) = -0.39 \text{ kcal/mol} \quad (6x)$$

$$(6x) - (5x)$$

$$e_x(\text{I-I}) - e_x(\text{Br-I}) = -0.35 \text{ kcal/mol}$$

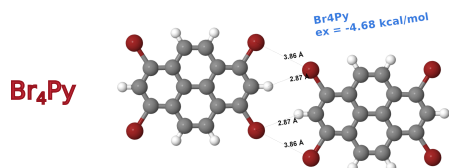

$$e_x = -4.68 \text{ kcal/mol}$$

$$e_{xBr} \approx 2e_x(\text{Br-Br}) + 2e_x(\text{Br-H}) \quad (4x)$$

## Types of $e_y$ interaction

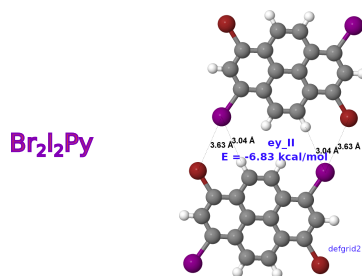

$$e_{y1} = -6.83 \text{ kcal/mol}$$

$$e_{y1} \approx 2e_y(\text{Br-I}) + 2e_y(\text{I-H}) \quad (1y)$$

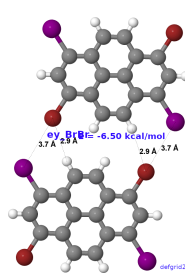

$$e_{y2} = -6.50 \text{ kcal/mol}$$

$$e_{y2} \approx 2e_y(\text{Br-I}) + 2e_y(\text{Br-H}) \quad (2y)$$

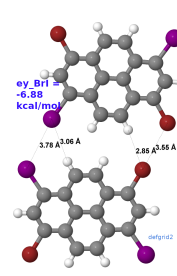

$$e_{y3} = -6.88 \text{ kcal/mol}$$

$$e_{y3} \approx e_y(\text{I-I}) + e_y(\text{Br-Br}) + e_y(\text{I-H}) + e_y(\text{Br-H}) \quad (3y)$$

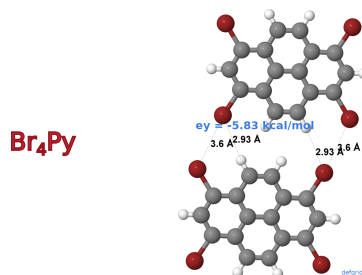

$$e_y = -5.83 \text{ kcal/mol}$$

$$e_{yBr} \approx 2e_y(\text{Br-Br}) + 2e_y(\text{Br-H}) \quad (4y)$$

$$(1y) - (2y)$$

$$e_y(\text{I-H}) - e_y(\text{Br-H}) = -0.16 \text{ kcal/mol}$$

$$[ (1y) + (2y) ] / 2 - (3y)$$

$$2e_y(\text{Br-I}) - e_y(\text{I-I}) - e_y(\text{Br-Br}) = 0.22 \text{ kcal/mol} \quad (5y)$$

$$(2y) - (4y)$$

$$e_y(\text{Br-I}) - e_y(\text{Br-Br}) = -0.34 \text{ kcal/mol} \quad (6y)$$

$$(6y) - (5y)$$

$$e_y(\text{I-I}) - e_y(\text{Br-I}) = -0.56 \text{ kcal/mol}$$

Fig. S1: DFT-optimized molecular pairs corresponding to configurations  $i = 1, 2, 3$  of the monomeric phase built of Br<sub>2</sub>I<sub>2</sub>Py and Br<sub>4</sub>Py molecules. Interaction energies  $e_{xi}$ ,  $e_{yi}$  obtained by DFT are shown for each case, along with equations for rough estimation of differences between X-X and X-H components of  $e_{xi}$  and  $e_{yi}$ .

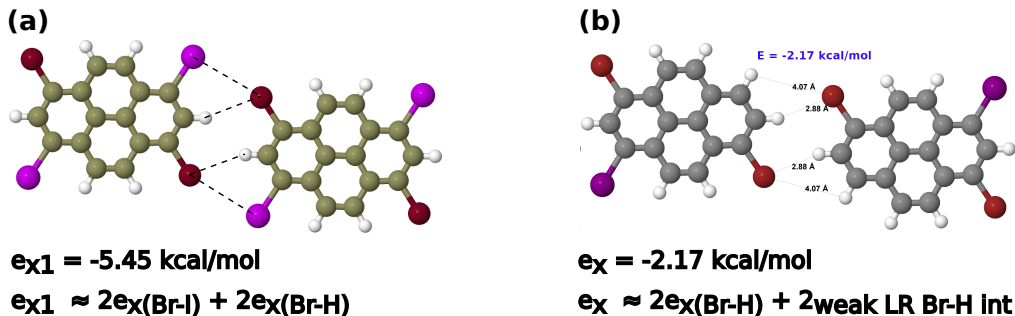

Fig. S2: DFT-optimized two-molecule clusters corresponding to (a)  $e_{x1}$  and (b) derivative of  $e_{x1}$  with both I atoms substituted by H atoms. The difference of -3.28 kcal/mol between energies of (a) and (b) configurations can be attributed mainly to the the Br - I bonding, amounting approximately to 60% of  $e_{x1}$ .

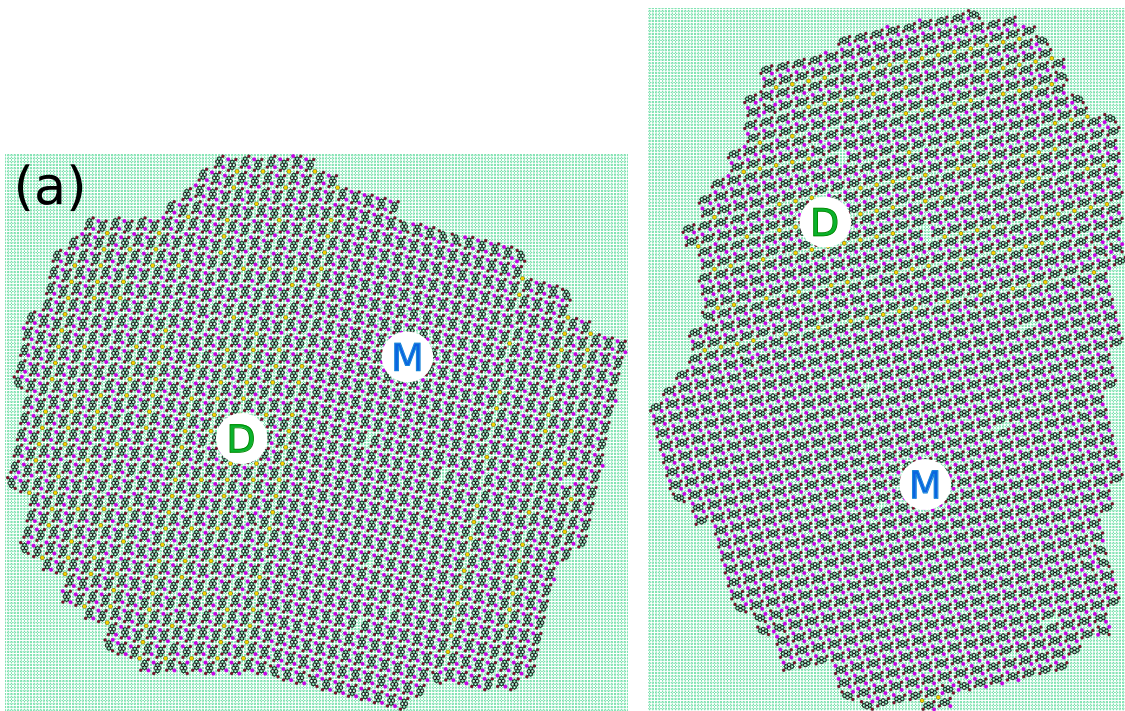

Fig. S3: Snapshots of MC simulation, illustrating phase separation and mixing in monomeric-dimeric system consisting of intact and singly deiodinated molecules when organometallic interaction is weak ( $e_{Au}/e_y = 0.3$ ). Here (a)  $c_2/c_1 = 1$  and (b)  $c_2/c_1 = 2$ . The letters M and D mark monomeric and dimeric regions, respectively.
